# Supplementary material
Source: publisher figshare collection journal article supplement (https://karger.figshare.com/articles/dataset/_/5125645)
Supplement: Supplementary file 1 [file 1]

**Supplementary Table 1:** Clones used for fluorescence *in situ* hybridization (FISH) and FISH results for the breakpoint regions in 8p22 and 8q13.3

| Region | Clone<br>(tel → cen for p arm)<br>(cen → tel for q arm) | FISH results |          |          | Genes<br>(tel → cen for p arm)<br>(cen → tel for q arm) |
|--------|---------------------------------------------------------|--------------|----------|----------|---------------------------------------------------------|
|        |                                                         | distal       | spanning | proximal |                                                         |
| 8p22   | RP11-529A3                                              | X            |          |          | <i>MSR1</i>                                             |
|        | RP11-314O20                                             | X            |          |          | <i>FGF20, MICU3</i>                                     |
|        | RP11-383B10                                             | X            |          |          | <i>MTUS1</i>                                            |
|        | RP11-880I6                                              | X            |          |          | <i>MTUS1, FGL1, PCM1</i>                                |
|        | G248P82306D8                                            | X            |          |          | <i>PCM1</i>                                             |
|        | RP11-1069K22                                            |              | X        |          | <i>PCM1</i>                                             |
|        | G248P86593D11                                           | X            |          |          | <i>PCM1</i>                                             |
|        | G248P87904B12                                           |              | X        |          | <i>PCM1</i>                                             |
|        | G248P80312F8                                            |              |          | X        | <i>PCM1, ASAH1</i>                                      |
|        | RP11-3K23                                               |              |          | X        | <i>NAT1</i>                                             |
|        | RP11-845O20                                             |              |          | X        | <i>NAT2</i>                                             |
|        | RP11-297I18                                             |              |          | X        | <i>PSD3</i>                                             |
|        | RP11-880E16                                             |              |          | X        | <i>PSD3</i>                                             |
| 8q13.3 | RP11-242B23                                             |              | X        |          | <i>EYA1</i> (exons 10-18)                               |
|        | RP11-263H10                                             |              | X        |          | <i>EYA1</i> (exons 2-18)                                |
|        | G248P83631D2                                            |              |          | X        | <i>EYA1</i> (exons 12-17)                               |
|        | G248P8007F2                                             |              | X        |          | <i>EYA1</i> (exons 10-12)                               |
|        | RP11-1077C17                                            | X            |          |          | <i>EYA1</i> (exons 1-9)                                 |
|        | G248P8860F10                                            | X            |          |          | <i>EYA1</i> (exons 5-9)                                 |
