# Supplementary material
Source: publisher figshare collection journal article supplement (https://karger.figshare.com/articles/dataset/_/5125645)
Supplement: Supplementary file 2 [file 1]

## Supplementary Figure 1

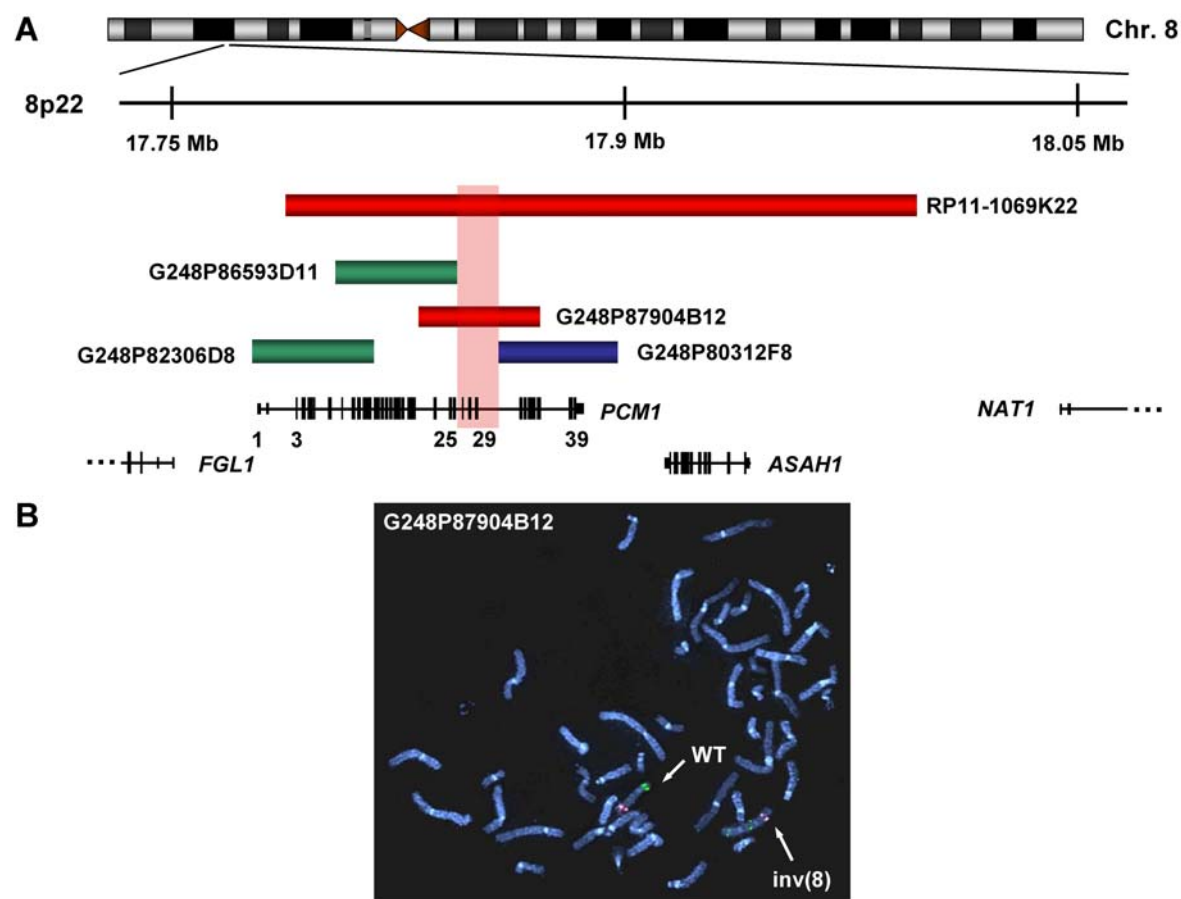

Supplementary Figure 1: Delineation of the inversion breakpoint in 8p22. (A) Physical map of the breakpoint region in 8p22. The ideogram of chromosome 8 is shown on the top. A region out of 8p22 is enlarged below and Mbs are indicated. BAC (RP11 Human BAC Library) and fosmid (WIBR-2 Human Fosmid Library) clones used for mapping the 8p22 breakpoint of the pericentric chromosome 8 inversion are indicated by colored bars and names are given. Color code of BACs and fosmids; blue: hybridized proximal to the 8p22 inversion breakpoint; red: spanned the breakpoint; green: hybridized distal to the breakpoint. The exon-intron structure of the *PCMI* and *ASAHI* genes is shown, that of *FGL1* and *NAT1* is only partially shown: vertical lines represent exons and horizontal lines introns. Selected *PCMI* exons are numbered. The breakpoint region is indicated by a red transparent area. The physical map was prepared according to the February 2009 Human Reference Sequence (GRCh37/hg19). (B) FISH with fosmid G248P87904B12 revealed a signal (green) on the wild-type chromosome 8 (WT) as well as split signals (green) on both arms of chromosome 8 with the pericentric inversion [inv(8)]. BAC RP11-16M22 hybridized to 8q23.3 and was used to highlight both chromosomes 8 (red signals). Chromosomes were counterstained with DAPI.
